# Supplementary material
Source: HighWire-hosted journal article supplement (https://bmjopen.bmj.com/content/13/5/e067386)
Supplement: inline-supplementary-material-1 [file inline-supplementary-material-1.pdf]

## SUPPLEMENTARY MATERIALS

### **Prevalence of undiagnosed stage 3 chronic kidney disease in France, Germany, Italy, Japan and the USA: results from the multinational observational REVEAL-CKD study**

Navdeep Tangri,<sup>1</sup> Toshiki Moriyama,<sup>2</sup> Markus P Schneider,<sup>3</sup> Jean Blaise J Virgitti,<sup>4</sup> Luca De Nicola,<sup>5</sup> Matthew Arnold,<sup>6</sup> Salvatore Barone,<sup>7</sup> Emily J Peach,<sup>8</sup> Eric Wittbrodt,<sup>9</sup> Hungta Chen,<sup>10</sup> Krister Järbrink,<sup>11</sup> Pamela Kushner<sup>12</sup>

<sup>1</sup> Department of Internal Medicine, University of Manitoba, Winnipeg, Manitoba, Canada

<sup>2</sup> Osaka University, Suita, Osaka, Japan

<sup>3</sup> Department of Nephrology and Hypertension, University Hospital Erlangen, University of Erlangen–Nuremberg, Erlangen, Germany

<sup>4</sup> Cabinet Médical, Orry-La-Ville, France

<sup>5</sup> Department of Advanced Medical and Surgical Sciences, Nephrology and Dialysis Unit, University of Campania Luigi Vanvitelli, Naples, Italy

<sup>6</sup> Real World Evidence Data & Analytics, BioPharmaceuticals Medical, AstraZeneca, Cambridge, UK

<sup>7</sup> Global Medical Affairs, BioPharmaceuticals Medical, AstraZeneca, Gaithersburg, Maryland, USA

<sup>8</sup> Cardiovascular, Renal and Metabolism Epidemiology, BioPharmaceuticals Medical, AstraZeneca, Cambridge, UK

<sup>9</sup> Cardiovascular, Renal and Metabolism Medical Affairs, BioPharmaceuticals Medical, AstraZeneca, Gaithersburg, Maryland, USA

<sup>10</sup> Medical/Payer Evidence Statistics, BioPharmaceuticals Medical, AstraZeneca,  
Gaithersburg, Maryland, USA

<sup>11</sup> Cardiovascular, Renal and Metabolism Evidence, BioPharmaceuticals Medical,  
AstraZeneca, Gothenburg, Sweden

<sup>12</sup> Department of Family Medicine, University of California Irvine Medical Center, Orange,  
California, USA

**Supplementary table 1.** Data sources used in the REVEAL-CKD study.

| Country | Data source(s)                                           | Database type (EMR/claims) | Coverage                   |
|---------|----------------------------------------------------------|----------------------------|----------------------------|
| France  | THIN: The Health Improvement Network/Cegedim Health Data | EMR                        | Primary care               |
| Germany | IQVIA Disease Analyzer                                   | EMR                        | Primary care/endocrinology |
| Japan   | Japan RWD                                                | EMR and claims             | Inpatient/outpatient       |
| USA     | TriNetX                                                  | EMR and claims             | Inpatient/outpatient       |
|         | LCED                                                     | EMR and claims             | Inpatient/outpatient       |
| Italy   | The Health Search Database/IQVIA Health Solutions Italy  | EMR                        | Primary care               |

EMR, electronic medical records; LCED, Explorys Linked Claims and Electronic Medical Records Data; RWD, Real World Data.

**Supplementary table 2.** REVEAL-CKD study inclusion and exclusion criteria

---

**Inclusion criteria:**

- $\geq 2$  consecutive eGFR laboratory measurements recorded in 2015 or later, with values  $\geq 30$  and  $< 60$  mL/min/1.73 m<sup>2</sup> (stage 3a/3b CKD using the CKD-EPI<sup>1</sup> equation) that are  $> 90$  and  $\leq 730$  days apart
- $\geq 12$  months of continuous presence in the database before the first qualifying eGFR measurement (look-back period)
- Age  $\geq 18$  years at the index date (defined as the date of the second qualifying laboratory eGFR measurement indicative of stage 3a/3b CKD).

---

**Exclusion criteria:**

- Solid organ transplant recorded before the index date
- Any evidence of advanced CKD (stages 4, 5, and end-stage renal disease) based on CKD diagnosis codes or renal replacement therapy before the index date.

---

CKD, chronic kidney disease; CKD-EPI, Chronic Kidney Disease Epidemiology Collaboration; eGFR, estimated glomerular filtration rate.

Supplementary table 3. ICD-9/10 codes used to identify patients with diagnosed stage 3 CKD

| Description                            | ICD-9*                                                                                                                               | ICD-10†                                    |
|----------------------------------------|--------------------------------------------------------------------------------------------------------------------------------------|--------------------------------------------|
| CKD, stage I                           | 585.1‡                                                                                                                               | N18.1§                                     |
| CKD, stage II                          | 585.2                                                                                                                                | N18.2                                      |
| CKD, stage III                         | 585.3                                                                                                                                | N18.3                                      |
| CKD, stage IV (severe)                 | 585.4                                                                                                                                | N18.4                                      |
| CKD, stage V                           | 585.5                                                                                                                                | N18.5                                      |
| End-stage renal disease                | 585.6                                                                                                                                | N18.6                                      |
| CKD, unspecified                       | 585.9                                                                                                                                | N18.9                                      |
| Hypertensive CKD                       | 403, 403.01, 403.1, 403.11, 403.9, 403.91, 404, 404.01, 404.02, 404.03, 404.1, 404.11, 404.12, 404.13, 404.9, 404.91, 404.92, 404.93 | I12.0, I12.9, I13.0, I13.10, I13.11, I13.2 |
| Diabetes with renal manifestation      | 250.4, 250.41, 250.42, 250.43                                                                                                        | E10.2, E11.2, E11.21, E11.22, E11.29       |
| Disorders from impaired renal function | 588, 588.1, 588.81, 588.89, 588.9                                                                                                    | N25.0, N25.1, N25.81, N25.89, N25.9        |

\*ICD-9 codes were used to identify CKD in Italy and in the US LCED and TriNetX databases.  
†ICD 10 codes were used to identify CKD in France, Germany, Japan and the US LCED and TriNetX databases.  
‡The ICD-9 code 585 (CKD, unspecified) was included in the code list for Italy owing to the large proportion of non-specific CKD reporting in this database.  
§The ICD-10 codes N18 and N18.0 (CKD, unspecified) were included in the code list for France owing to the large proportion of non-specific CKD reporting in this database.  
CKD, chronic kidney disease; LCED, Explorys Linked Claims and Electronic Medical Records Data; ICD, International Classification of Diseases.

**Supplementary table 4.** ICD-9/10 codes used to identify CKD in the sensitivity analysis using a broader definition for CKD adapted from Winkelmayr et al., 2005<sup>2</sup>

| Description                            | ICD-9*                                                                                                                               | ICD-10†                                                                                                                                                                             |
|----------------------------------------|--------------------------------------------------------------------------------------------------------------------------------------|-------------------------------------------------------------------------------------------------------------------------------------------------------------------------------------|
| CKD, stage I                           | 585.1‡                                                                                                                               | N18.1§                                                                                                                                                                              |
| CKD, stage II                          | 585.2                                                                                                                                | N18.2                                                                                                                                                                               |
| CKD, stage III                         | 585.3                                                                                                                                | N18.3                                                                                                                                                                               |
| CKD, stage IV (severe)                 | 585.4                                                                                                                                | N18.4                                                                                                                                                                               |
| CKD, stage V                           | 585.5                                                                                                                                | N18.5                                                                                                                                                                               |
| End-stage renal disease                | 585.6                                                                                                                                | N18.6                                                                                                                                                                               |
| CKD, unspecified                       | 585.9                                                                                                                                | N18.9                                                                                                                                                                               |
| Chronic renal insufficiency            | 582, 582.1, 582.2, 582.4, 582.81, 582.89, 582.9, 583, 583.1, 583.2, 583.4, 583.6, 583.7, 583.81, 583.89, 583.9                       | N03.0, N03.1, N03.2, N03.3, N03.4, N03.5, N03.6, N03.7, N03.8, N03.9, N05.0, N05.1, N05.2, N05.3, N05.4, N05.5, N05.6, N05.7, N05.8, N05.9, N19, N26.9                              |
| Hypertensive CKD                       | 403, 403.01, 403.1, 403.11, 403.9, 403.91, 404, 404.01, 404.02, 404.03, 404.1, 404.11, 404.12, 404.13, 404.9, 404.91, 404.92, 404.93 | I12.0, I12.9, I13.0, I13.10, I13.11, I13.2                                                                                                                                          |
| Diabetes with renal manifestation      | 250.4, 250.41, 250.42, 250.43                                                                                                        | E10.2, E11.2, E11.21, E11.22, E11.29                                                                                                                                                |
| Disorders from impaired renal function | 588, 588.1, 588.81, 588.89, 588.9                                                                                                    | N25.0, N25.1, N25.81, N25.89, N25.9, M10.30, M10.311, M10.312, M10.319, M10.321, M10.322, M10.329, M10.331, M10.332, M10.339, M10.341, M10.342, M10.349, M10.351, M10.352, M10.359, |

| Description         | ICD-9*                                                                                                                                                                                                                                                     | ICD-10†                                                                                                                                                                                                                                                                                                                                                                               |
|---------------------|------------------------------------------------------------------------------------------------------------------------------------------------------------------------------------------------------------------------------------------------------------|---------------------------------------------------------------------------------------------------------------------------------------------------------------------------------------------------------------------------------------------------------------------------------------------------------------------------------------------------------------------------------------|
|                     |                                                                                                                                                                                                                                                            | M10.361, M10.362, M10.369, M10.371, M10.372, M10.379, M10.38, M10.39                                                                                                                                                                                                                                                                                                                  |
| Acute renal failure | 572.4, 580, 580.4, 580.81, 580.89, 580.9, 584.5, 584.6, 584.7, 584.8, 584.9, 791.2, 791.3                                                                                                                                                                  | K76.7, N00.3, N00.8, N00.9, N01.3, N17.0, N17.1, N17.2, N17.8, N17.9, R82.1, R82.3                                                                                                                                                                                                                                                                                                    |
| Miscellaneous       | 274.1, 440.1, 442.1, 453.3, 581, 581.1, 581.2, 581.3, 581.81, 581.89, 581.9, 586, 587, 593, 593.1, 593.2, 593.3, 593.4, 593.5, 593.6, 593.7, 593.71, 593.72, 593.73, 593.81, 593.82, 593.89, 593.9, 753, 753.3, 866, 866.01, 866.1, 866.11, 866.12, 866.13 | I70.1, I72.2, I82.3, N02.2, N04.0, N04.1, N04.2, N04.3, N04.4, N04.5, N04.6, N04.7, N04.8, N04.9, N08, N13.4, N13.5, N13.70, N13.71, N13.721, N13.722, N13.729, N13.731, N13.732, N13.739, N13.8, N28.1, N28.81, N28.82, N28.83, N28.89, N28.9, Q60.2, Q60.5, Q63.0, Q63.1, Q63.2, Q63.3, Q63.8, Q63.9, R80.2, S31.001, S37.009, S37.019, S37.029, S37.039, S37.049, S37.059, S37.069 |

\*ICD-9 codes were used to identify CKD in Italy and in the US LCED and TriNetX databases.

†ICD-10 codes were used to identify CKD in France, Germany, Japan and the US LCED and TriNetX databases.

‡The ICD-9 code 585 (CKD, unspecified) was included in the code list for Italy owing to the large proportion of non-specific CKD reporting in this database.

§The ICD-10 codes N18 and N18.0 (CKD, unspecified) were included in the code list for France owing to the large proportion of non-specific CKD reporting in this database.

CKD, chronic kidney disease; LCED, Explorys Linked Claims and Electronic Medical Records Data; ICD, International Classification of Diseases.

**Supplementary table 5.** Sensitivity analysis of undiagnosed stage 3 CKD using a broader CKD definition adapted from Winkelmayr et al., 2005<sup>2</sup> according to country and database

| Country<br>Database | France<br>THIN Cegedim<br>n=20 012 | Germany<br>Disease Analyzer<br>n=26 767 | Italy<br>LPD<br>n=65 676 | Japan<br>Japan RWD<br>n=90 902 | USA<br>LCED<br>n=22 470 | TriNetX<br>n=250 879 |
|---------------------|------------------------------------|-----------------------------------------|--------------------------|--------------------------------|-------------------------|----------------------|
| CKD status*, n (%)  |                                    |                                         |                          |                                |                         |                      |
| Diagnosed           | 2031 (10.1)                        | 6165 (23.0)                             | 21 146 (32.2)            | 12 113 (13.3)                  | 10 421 (46.4)           | 109 735 (43.7)       |
| Undiagnosed         | 17 981 (89.9)                      | 20 602 (77.0)                           | 44 530 (67.8)            | 78 789 (86.7)                  | 12 049 (53.6)           | 141 144 (56.3)       |

\*Percentages represent the proportion of diagnosed/undiagnosed cases in the overall cohort for each country/database.  
CKD, chronic kidney disease; LCED, Explorys Linked Claims and Electronic Medical Records Data; LPD, Longitudinal Patient Database; RWD, Real World Data; THIN, The Health Improvement Network.

**Supplementary table 6.** Sensitivity analysis of undiagnosed CKD in patients in the TriNetX database with one eGFR measurement indicative of stage 3 CKD

| Country Database                                     | USA TriNetX<br>n=532 921 |
|------------------------------------------------------|--------------------------|
| <b>CKD status*, n (%)</b>                            |                          |
| Diagnosed                                            | 94 780 (17.8)            |
| Undiagnosed                                          | 438 141 (82.2)           |
| <b>Age, y, median (IQR)</b>                          | 67 (59–75)               |
| <b>Age groups, y</b>                                 |                          |
| <45                                                  | 28 888 (5.4)             |
| 45–64                                                | 187 109 (35.1)           |
| 65–74                                                | 174 126 (32.7)           |
| ≥75                                                  | 142 798 (26.8)           |
| <b>Male, n (%)</b>                                   | 232 069 (43.5)           |
| <b>eGFR, mL/min/1.73 m<sup>2</sup>, median (IQR)</b> | 54 (48–58)               |
| <b>CKD stage, n (%)</b>                              |                          |
| CKD stage 3a                                         | 439 183 (82.4)           |
| CKD stage 3b                                         | 93 738 (17.6)            |
| <b>Baseline UACR available, n (%)</b>                | 5495 (1.0)               |
| <b>HDL, mmol/L, median (IQR)</b>                     | 1.24 (1.01–1.53)         |
| Missing, n                                           | 349 531                  |
| <b>LDL, mmol/L, median (IQR)</b>                     | 2.51 (1.91–3.21)         |
| Missing, n                                           | 322 358                  |
| <b>Comorbidities, n (%)</b>                          |                          |
| Hypertension                                         | 371 933 (69.8)           |
| Type 2 diabetes                                      | 160 129 (30.0)           |
| Established CVD <sup>†</sup>                         | 81 883 (15.4)            |
| Heart failure                                        | 66 522 (12.5)            |
| Atrial fibrillation                                  | 64 232 (12.1)            |
| <b>Medication use, n (%)</b>                         |                          |
| ACE inhibitor                                        | 100 723 (18.9)           |
| ARB                                                  | 58 812 (11.0)            |
| SGLT2 inhibitor                                      | 3777 (0.7)               |
| GLD (any)                                            | 100 714 (18.9)           |
| Antiplatelets                                        | 25 371 (4.8)             |
| Loop diuretic                                        | 64 161 (12.0)            |
| Anticoagulants                                       | 107 616 (20.2)           |

Unless otherwise stated, percentages represent the proportion of patients in a specific group (eg, age) or with a specific variable (eg, medical history).

\*Percentages represent the proportion of diagnosed/undiagnosed cases in the overall cohort.

<sup>†</sup>Established CVD includes patients with a history of myocardial infarction, unstable angina, stroke, transient ischemic attack, coronary artery bypass graft and percutaneous coronary intervention.

ACE, angiotensin-converting enzyme; ARB, angiotensin-II receptor blocker; CKD, chronic kidney disease; CVD, cardiovascular disease; eGFR, estimated glomerular filtration rate; GLD, glucose-lowering drug; HDL, high-density lipoprotein; ICD, International Classification of Diseases; IQR, interquartile range; LDL, low-density lipoprotein; SGLT2, sodium-glucose cotransporter-2; UACR, urinary albumin-creatinine ratio.

Supplementary table 7. Overall patient characteristics at study index according to country, by CKD diagnosis status 6 months after index

| Country                            | France                  |                     | Germany                 |                      | Italy                      |                          | Japan                   |                      | USA                     |                      |                          |                        |
|------------------------------------|-------------------------|---------------------|-------------------------|----------------------|----------------------------|--------------------------|-------------------------|----------------------|-------------------------|----------------------|--------------------------|------------------------|
| Database                           | THIN Cegedim            |                     | Disease Analyzer        |                      | LPD                        |                          | Japan RWD               |                      | LCED                    |                      | TriNetX                  |                        |
|                                    | Undiagnosed<br>n=19 120 | Diagnosed*<br>n=892 | Undiagnosed<br>n=22 557 | Diagnosed*<br>n=4210 | Undiagnosed<br>n=50 547    | Diagnosed*<br>n=15 129   | Undiagnosed<br>n=83 693 | Diagnosed*<br>n=7209 | Undiagnosed<br>n=13 845 | Diagnosed*<br>n=8625 | Undiagnosed<br>n=161 254 | Diagnosed*<br>n=89 625 |
| Age, y, median (IQR)               | 80 (72–86)              | 77 (69–84)          | 79 (72–84)              | 79 (71–84)           | 80 (74–85)                 | 80 (73–85)               | 76 (69–83)              | 77 (68–83)           | 74 (64–82)              | 74 (64–82)           | 71 (64–79)               | 70 (62–78)             |
| Age groups, y                      |                         |                     |                         |                      |                            |                          |                         |                      |                         |                      |                          |                        |
| <45                                | 58 (0.3)                | 9 (1.0)             | 46 (0.2)                | 20 (0.5)             | 95 (0.2)                   | 93 (0.6)                 | 652 (0.8)               | 139 (1.9)            | 109 (0.8)               | 134 (1.6)            | 2426 (1.5)               | 3097 (3.5)             |
| 45–64                              | 1551 (8.1)              | 126 (14.1)          | 1957 (8.7)              | 474 (11.3)           | 2724 (5.4)                 | 1056 (7.0)               | 12 260 (14.6)           | 1026 (14.2)          | 3754 (27.1)             | 2237 (25.9)          | 38 302 (23.8)            | 25 424 (28.4)          |
| 65–74                              | 4421 (23.1)             | 220 (24.7)          | 5088 (22.6)             | 944 (22.4)           | 10 976 (21.7)              | 3288 (21.7)              | 23 696 (28.3)           | 1931 (26.8)          | 3415 (24.7)             | 2177 (25.2)          | 57 891 (35.9)            | 29 989 (33.5)          |
| ≥75                                | 13 090 (68.5)           | 537 (60.2)          | 15 466 (68.6)           | 2772 (65.8)          | 36 752 (72.7)              | 10 692 (70.7)            | 47 085 (56.3)           | 4113 (57.1)          | 6567 (47.4)             | 4077 (47.3)          | 62 635 (38.8)            | 31 115 (34.7)          |
| Male, n (%)                        | 8599 (45.0)             | 492 (55.2)          | 9173 (40.7)             | 2043 (48.5)          | 19 820 (39.2)              | 7908 (52.3)              | 43 658 (52.2)           | 4465 (61.9)          | 5438 (39.3)             | 4613 (53.5)          | 57 989 (36.0)            | 47 123 (52.6)          |
| eGFR, mL/min/1.73 m², median (IQR) | 52 (46–56)              | 45 (38–52)          | 52 (45–56)              | 49 (40–55)           | 51 (44–55)                 | 45 (38–52)               | 53 (47–56)              | 45 (37–53)           | 53 (47–57)              | 47 (40–53)           | 53 (47–57)               | 47 (40–53)             |
| CKD stage, n (%)                   |                         |                     |                         |                      |                            |                          |                         |                      |                         |                      |                          |                        |
| CKD stage 3a                       | 14 661 (76.7)           | 440 (49.3)          | 16 871 (74.8)           | 2621 (62.3)          | 36 460 (72.1)              | 7477 (49.4)              | 66 955 (80.0)           | 3713 (51.5)          | 11 348 (82.0)           | 4972 (57.6)          | 131 385 (81.5)           | 52 233 (58.3)          |
| CKD stage 3b                       | 4459 (23.3)             | 452 (50.7)          | 5686 (25.2)             | 1589 (37.7)          | 14 087 (27.9)              | 7652 (50.6)              | 16 738 (20.0)           | 3496 (48.5)          | 2497 (18.0)             | 3653 (42.4)          | 29 869 (18.5)            | 37 392 (41.7)          |
| Baseline UACR available, n (%)     | 424 (2.2)               | 26 (2.9)            | 0 (0.0) <sup>†</sup>    | 0 (0.0) <sup>†</sup> | 4 (<0.1) <sup>‡</sup>      | 5 (<0.1) <sup>‡</sup>    | 3851 (4.6)              | 1141 (15.8)          | 474 (3.4)               | 425 (4.9)            | 2455 (1.5)               | 2149 (2.4)             |
| HDL, mmol/L, median (IQR)          | 1.37 (1.11–1.65)        | 1.32 (1.08–1.65)    | 1.34 (1.11–1.63)        | 1.29 (1.06–1.55)     | 1.32 (1.11–1.59)           | 1.27 (1.06–1.53)         | 1.40 (1.16–1.71)        | 1.32 (1.09–1.60)     | 1.24 (1.03–1.53)        | 1.16 (0.96–1.45)     | 1.24 (1.03–1.55)         | 1.14 (0.93–1.42)       |
| Missing, n                         | 6172                    | 342                 | 6904                    | 1328                 | 13 379                     | 4134                     | 33 243                  | 2062                 | 5673                    | 4349                 | 88 031                   | 50 767                 |
| LDL, mmol/L, median (IQR)          | 2.89 (2.24–3.61)        | 2.81 (2.18–3.53)    | 2.87 (2.20–3.70)        | 2.70 (2.07–3.49)     | 2.74 (2.12–3.39)           | 2.53 (1.97–3.21)         | 2.77 (2.22–3.34)        | 2.53 (2.04–3.10)     | 2.46 (1.89–3.13)        | 2.25 (1.71–2.95)     | 2.43 (1.87–3.13)         | 2.22 (1.68–2.92)       |
| Missing, n                         | 6331                    | 345                 | 6026                    | 1061                 | 14 915                     | 4560                     | 31 643                  | 1946                 | 4988                    | 3948                 | 78 408                   | 47 066                 |
| Comorbidities, n (%)               |                         |                     |                         |                      |                            |                          |                         |                      |                         |                      |                          |                        |
| Hypertension                       | 11 737 (61.4)           | 675 (75.7)          | 10 969 (48.6)           | 2710 (64.4)          | 38 849 (76.9)              | 12 475 (82.5)            | 47 311 (56.5)           | 5711 (79.2)          | 11 863 (85.7)           | 8198 (95.0)          | 123 002 (76.3)           | 80 153 (89.4)          |
| Type 2 diabetes                    | 3311 (17.3)             | 221 (24.8)          | 5145 (22.8)             | 1790 (42.5)          | 15 785 (31.2) <sup>§</sup> | 5515 (36.5) <sup>§</sup> | 15 655 (18.7)           | 3334 (46.2)          | 4667 (33.7)             | 4621 (53.6)          | 49 299 (30.6)            | 46 142 (51.5)          |
| Established CVD <sup>¶</sup>       | 1368 (7.2)              | 81 (9.1)            | 1467 (6.5)              | 437 (10.4)           | 5153 (10.2)                | 1784 (11.8)              | 23 248 (27.8)           | 2389 (33.1)          | 3337 (24.1)             | 2955 (34.3)          | 26 666 (16.5)            | 23 078 (25.7)          |
| Heart failure                      | 922 (4.8)               | 64 (7.2)            | 3318 (14.7)             | 1046 (24.8)          | 4248 (8.4)                 | 2130 (14.1)              | 26 077 (31.2)           | 3986 (55.3)          | 2523 (18.2)             | 2791 (32.4)          | 22 422 (13.9)            | 24 580 (27.4)          |
| Atrial fibrillation                | 2057 (10.8)             | 104 (11.7)          | 3351 (14.9)             | 866 (20.6)           | 8293 (16.4)                | 2812 (18.6)              | 10 765 (12.9)           | 1226 (17.0)          | 2409 (17.4)             | 2218 (25.7)          | 23 224 (14.4)            | 17 990 (20.1)          |
| Medication use, n (%)              |                         |                     |                         |                      |                            |                          |                         |                      |                         |                      |                          |                        |
| ACE inhibitor                      | 4363 (22.8)             | 271 (30.4)          | 8023 (35.6)             | 1612 (38.3)          | 19 141 (37.9)              | 5957 (39.4)              | 4027 (4.8)              | 474 (6.6)            | 5058 (36.5)             | 3725 (43.2)          | 33 532 (20.8)            | 24 274 (27.1)          |
| ARB                                | 6181 (32.3)             | 349 (39.1)          | 8855 (39.3)             | 1718 (40.8)          | 19 770 (39.1)              | 6428 (42.5)              | 18 959 (22.7)           | 2463 (34.2)          | 3605 (26.0)             | 2697 (31.3)          | 22 656 (14.0)            | 15 290 (17.1)          |
| SGLT2 inhibitor                    | 0 (0.0)                 | 0 (0.0)             | 0 (0.0)                 | 0 (0.0)              | 287 (0.6)                  | 66 (0.4)                 | 1082 (1.3)              | 281 (3.9)            | 11 (0.1)                | 11 (0.1)             | 1171 (0.7)               | 978 (1.1)              |
| GLD (any)                          | 3300 (17.3)             | 189 (21.2)          | 6742 (29.9)             | 1577 (37.5)          | 13 108 (25.9)              | 4255 (28.1)              | 11 303 (13.5)           | 2128 (29.5)          | 5012 (36.2)             | 4388 (50.9)          | 29 690 (18.4)            | 30 569 (34.1)          |
| Antiplatelets                      | 5636 (29.5)             | 328 (36.8)          | 5451 (24.2)             | 1146 (27.2)          | 23 245 (46.0)              | 7906 (52.3)              | 16 690 (19.9)           | 2106 (29.2)          | 1274 (9.2)              | 1202 (13.9)          | 8256 (5.1)               | 8052 (9.0)             |
| Loop diuretic                      | 2747 (14.4)             | 177 (19.8)          | 8564 (38.0)             | 1944 (46.2)          | 15 719 (31.1)              | 6441 (42.6)              | 10 346 (12.4)           | 1633 (22.7)          | 2720 (19.6)             | 2843 (33.0)          | 21 136 (13.1)            | 22 334 (24.9)          |
| Anticoagulants                     | 2885 (15.1)             | 133 (14.9)          | 6838 (30.3)             | 1344 (31.9)          | 12 214 (24.2)              | 3983 (26.3)              | 12 886 (15.4)           | 1600 (22.2)          | 3434 (24.8)             | 2913 (33.8)          | 28 521 (17.7)            | 26 465 (29.5)          |

Percentages represent the proportion of diagnosed/undiagnosed patients in a specific group (eg, age) or with a specific variable (eg, medical history).

\*Diagnosed cases include patients with a corresponding ICD-9/10 diagnosis code for CKD at or within 6 months of study index (date of second qualifying eGFR measurement).

<sup>†</sup>UACR testing data not available in the German Disease Analyzer database.

<sup>‡</sup>Direct measurements of UACR were not available in the IQVIA Longitudinal Patient Database in Italy, however, UACR was calculated as urine albumin (mg/dL) divided by urine creatinine (g/dL) if patients had records for both of these variables on the same day.

<sup>§</sup>Owing to a lack of granularity for ICD-9 diagnostic codes in the database used, type of diabetes could not be determined in patients from Italy.

<sup>‡</sup>Established CVD includes patients with a history of myocardial infarction, unstable angina, stroke, transient ischaemic attack, coronary artery bypass graft and percutaneous coronary intervention.

<sup>¶</sup>Owing to a lack of granularity for ICD-9 codes in the database used, established CVD does not include coronary artery bypass graft and percutaneous coronary intervention in patients from Italy.

ACE, angiotensin-converting enzyme; ARB, angiotensin-II receptor blocker; CKD, chronic kidney disease; CVD, cardiovascular disease; eGFR, estimated glomerular filtration rate; GLD, glucose-lowering drug; HDL, high-density lipoprotein; ICD, International Classification of Diseases; IQR, interquartile range; LCED, Explorys Linked Claims and Electronic Medical Records Data; LDL, low-density lipoprotein; LPD, Longitudinal Patient Database; RWD, Real World Data; SGLT2, sodium-glucose cotransporter-2; THIN, The Health Improvement Network; UACR, urinary albumin-creatinine ratio

**Supplementary table 8.** Comparison of CKD stages in Black and non-Black patients from the US TriNetX database when calculating eGFR using two different equations: CKD-EPI (without adjusting for race) and CKD-EPI (with race modifier)<sup>1</sup>

|                              | <b>CKD-EPI,<br/>no race modifier</b> | <b>CKD-EPI,<br/>with race modifier</b> |
|------------------------------|--------------------------------------|----------------------------------------|
| <b>Black (n=50 283)</b>      |                                      |                                        |
| Stage 2 CKD, n (%)           | 0 (0.0)                              | 23 156 (46.1)                          |
| Stage 3a CKD, n (%)          | 36 005 (71.6)                        | 20 455 (40.7)                          |
| Stage 3b CKD, n (%)          | 14 278 (28.4)                        | 6672 (13.3)                            |
| <b>Non-Black (n=200 596)</b> |                                      |                                        |
| Stage 2 CKD, n (%)           | 0 (0.0)                              | 0 (0.0)                                |
| Stage 3a CKD, n (%)          | 147 613 (73.6)                       | 147 613 (73.6)                         |
| Stage 3b CKD, n (%)          | 52 983 (26.4)                        | 52 983 (26.4)                          |

CKD, chronic kidney disease; CKD-EPI, Chronic Kidney Disease Epidemiology Collaboration; eGFR, estimated glomerular filtration rate.

**Supplementary figure 1.** Prevalence of undiagnosed stage 3 CKD according to calendar year of study index according to country and database

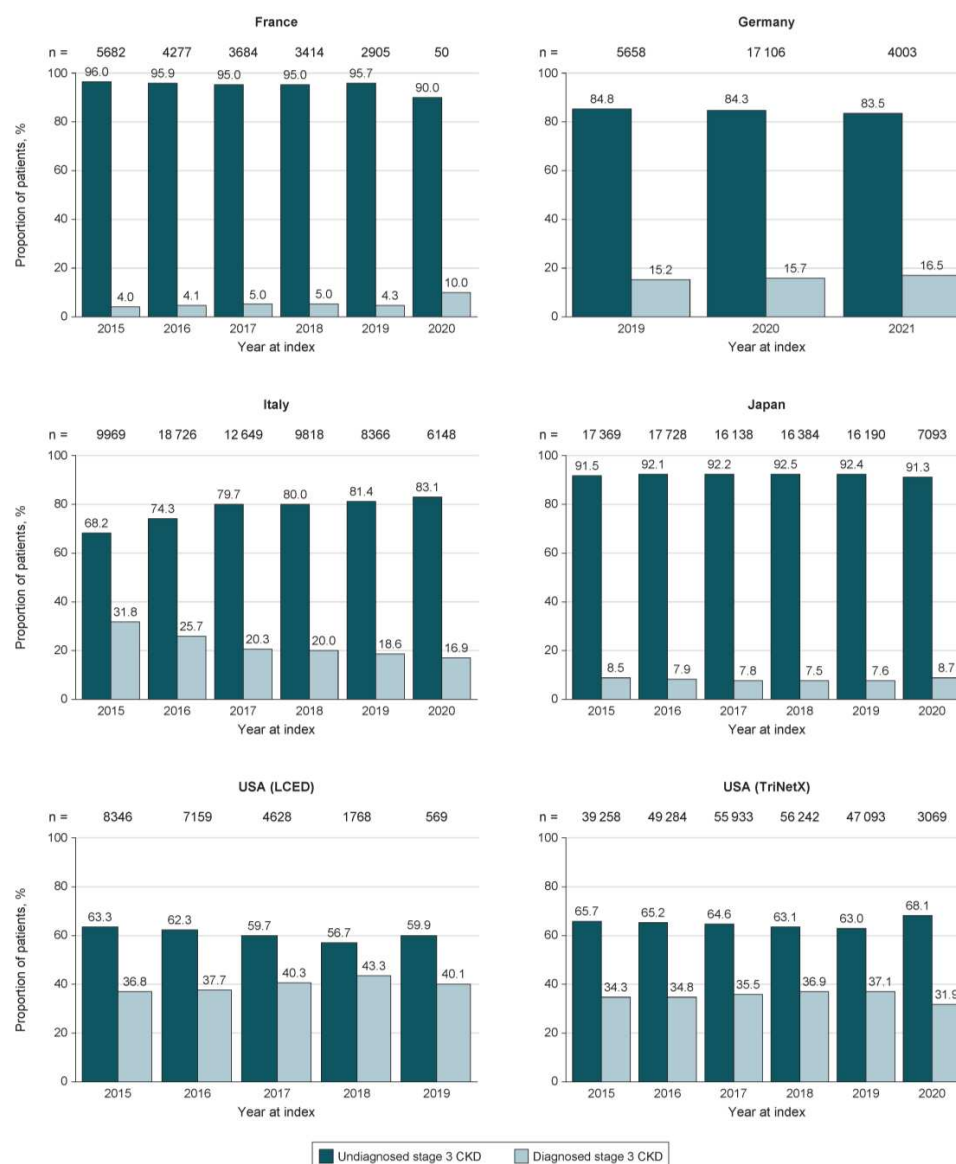

CKD, chronic kidney disease; LCED, Explorys Linked Claims and Electronic Medical Records Data.

**Supplementary figure 2.** Prevalence of undiagnosed stage 3 CKD according to age group at study index according to country and database

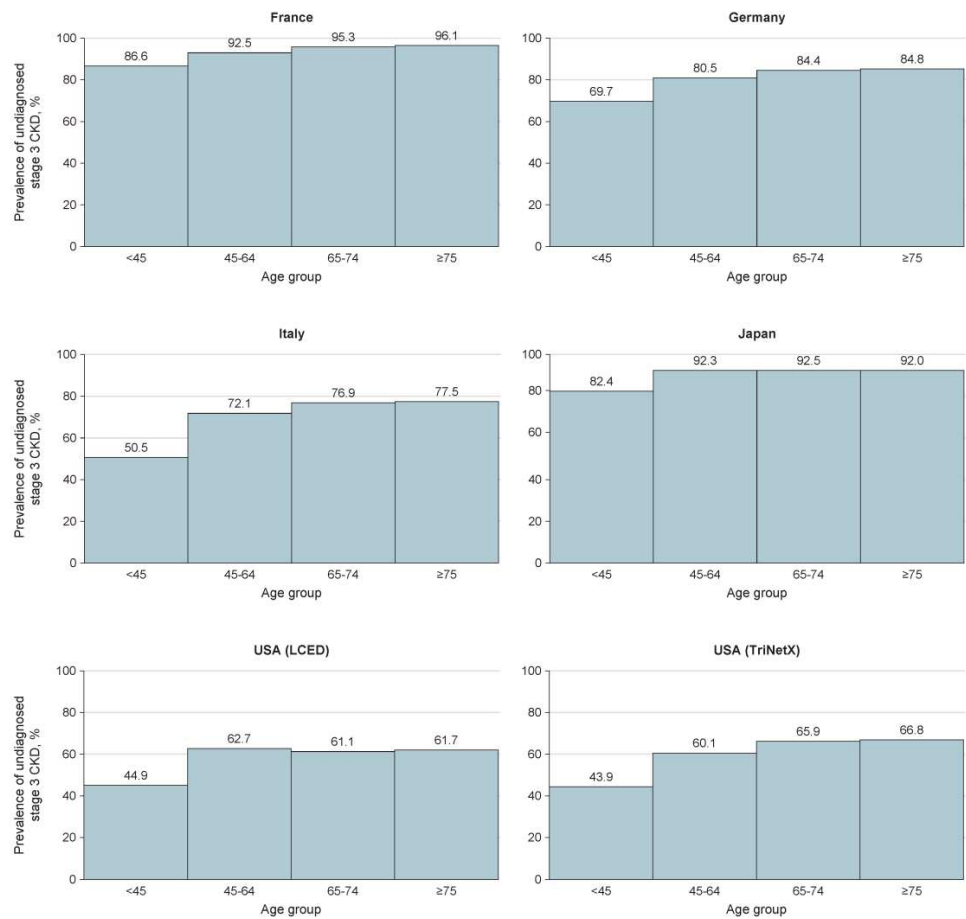

CKD, chronic kidney disease; LCED, Explorys Linked Claims and Electronic Medical Records Data.

**Supplementary figure 3.** Factors associated with a lack of CKD diagnosis any time before or up to 6 months after index date according to country and database

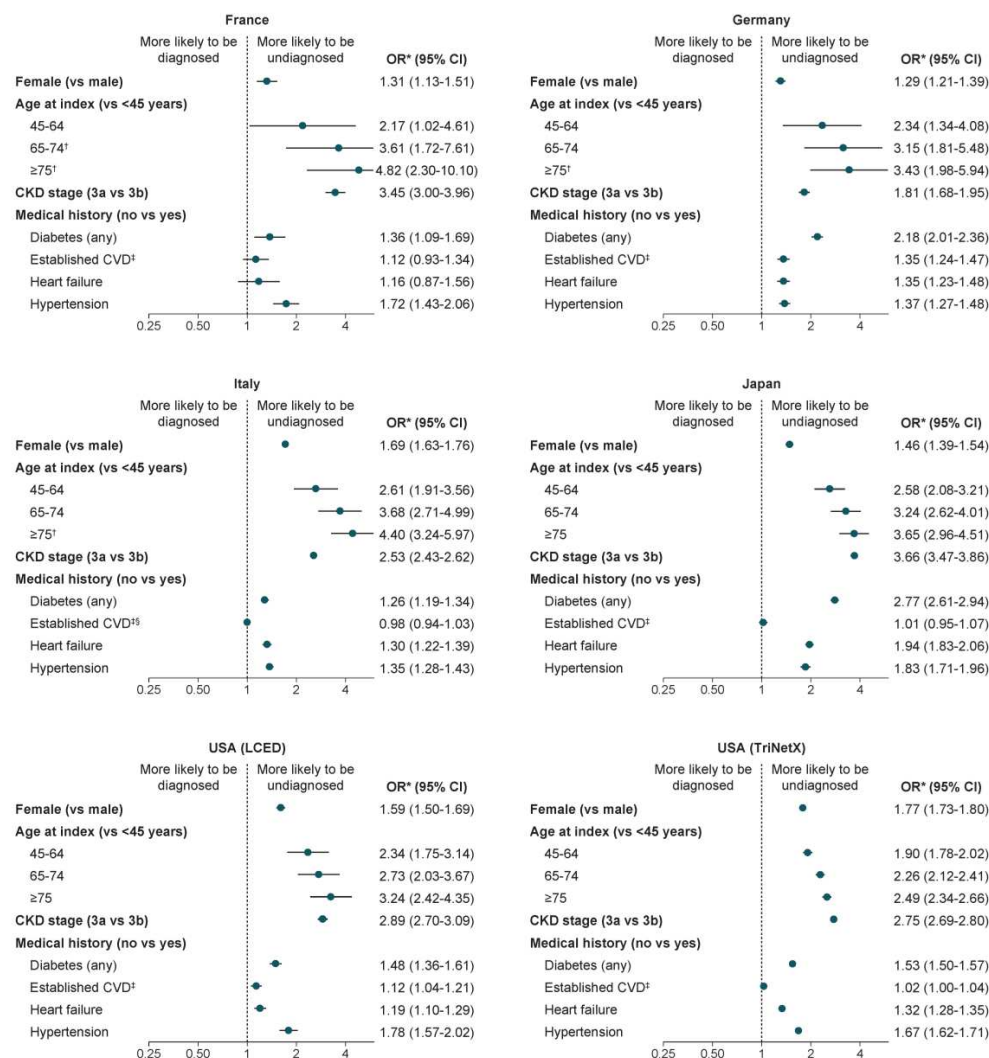

Whiskers represent 95% confidence intervals.

\*Odds ratios adjusted for covariates at index: sex, age, CKD stage, family history of CKD (not available in France, Germany and Japan), number of clinical visits in year before index, medical history (heart failure, established CVD, diabetes [any type], hypertension, other kidney disease) and medication use (diuretics,  $\beta$ -blockers, renin-angiotensin-aldosterone system inhibitors, calcium channel blockers, lipid-lowering drugs, antithrombotic drugs, metformin, glucagon-like peptide receptor-1 inhibitors or sodium-glucose cotransporter-2 inhibitors, and other glucose-lowering drugs).

†Upper 95% confidence interval extends beyond the boundary of the graph.

‡Established CVD includes patients with a history of myocardial infarction, unstable angina, stroke, transient ischemic attack, coronary artery bypass graft and percutaneous coronary intervention.

§Owing to a lack of granularity for ICD-9 codes in the database used, established CVD does not include coronary artery bypass graft and percutaneous coronary intervention in patients from Italy.

CKD, chronic kidney disease; CVD, cardiovascular disease; LCED, Explorys Linked Claims and Electronic Medical Records Data.

**Supplementary figure 4.** Factors associated with time to CKD diagnosis in patients undiagnosed at index according to country and database

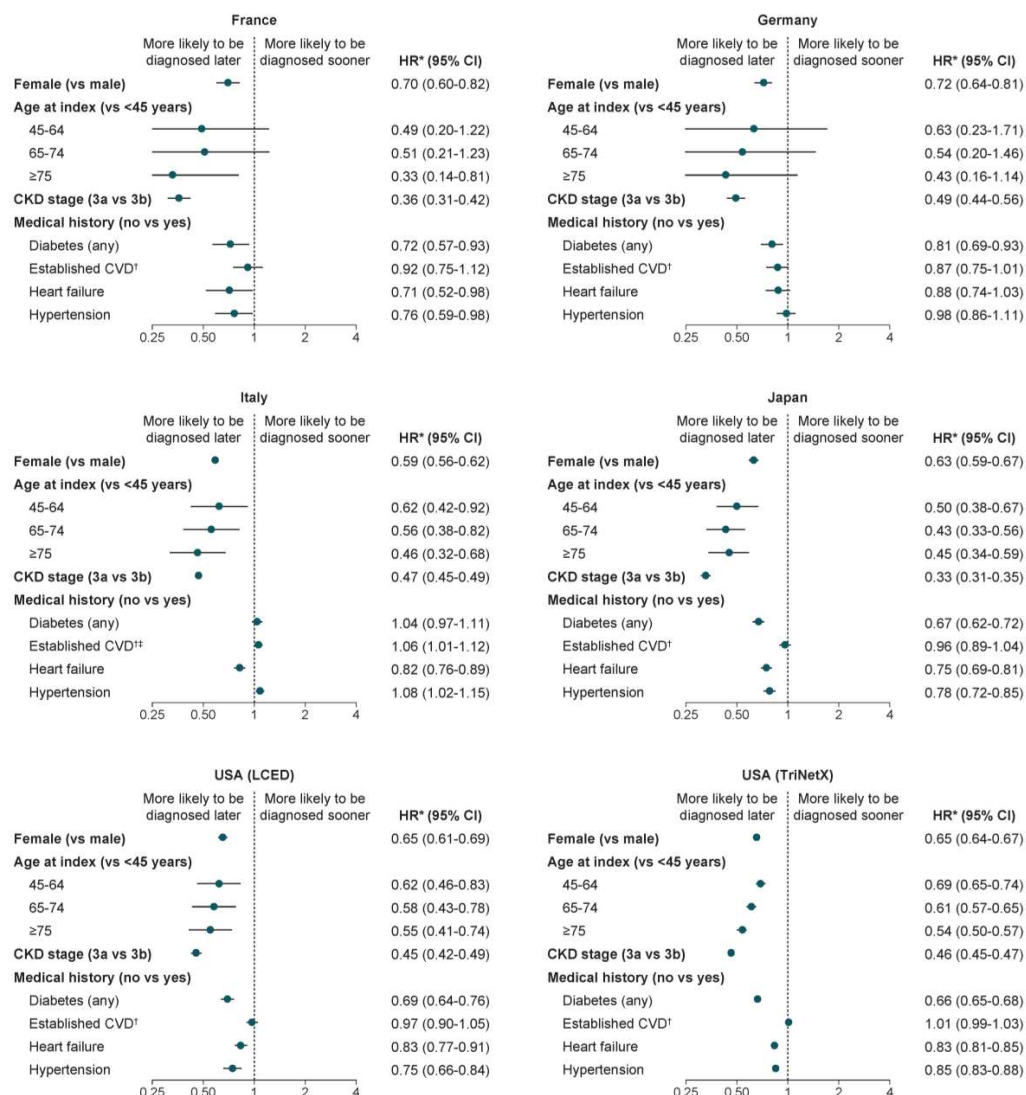

Whiskers represent 95% confidence intervals.

<sup>a</sup>Hazard ratios adjusted for covariates at index: sex, age, CKD stage, family history of CKD (not available in France, Germany and Japan), number of clinical visits in year before index, medical history (heart failure, established CVD, diabetes [any type], hypertension, other kidney disease) and medication use (diuretics,  $\beta$ -blockers, renin-angiotensin-aldosterone system inhibitors, calcium channel blockers, lipid-lowering drugs, antithrombotic drugs, metformin, glucagon-like peptide receptor-1 inhibitors or sodium-glucose cotransporter-2 inhibitors and other glucose-lowering drugs).

<sup>b</sup>Established CVD includes patients with a history of myocardial infarction, unstable angina, stroke, transient ischemic attack, coronary artery bypass graft and percutaneous coronary intervention.

<sup>c</sup>Owing to a lack of granularity for ICD-9 codes in the database used, established CVD does not include coronary artery bypass graft and percutaneous coronary intervention in patients from Italy.

CKD, chronic kidney disease; CVD, cardiovascular disease; HR, hazard ratio; LCED, Explorys Linked Claims and Electronic Medical Records Data.

## References

1. Levey AS, Stevens LA, Schmid CH, *et al.* A new equation to estimate glomerular filtration rate. *Ann Intern Med.* 2009;150(9):604–12. doi: 10.7326/0003-4819-150-9-200905050-00006
2. Winkelmayer WC, Schneeweiss S, Mogun H, Patrick AR, Avorn J, Solomon DH. Identification of individuals with CKD from Medicare claims data: a validation study. *Am J Kidney Dis.* 2005;46(2):225–32. doi: 10.1053/j.ajkd.2005.04.029
